# Supplementary material
Source: PubMed Central journal article supplement (PMC4711678)
Supplement: cmi2014128x1.pdf [file cmi2014128x1.pdf]

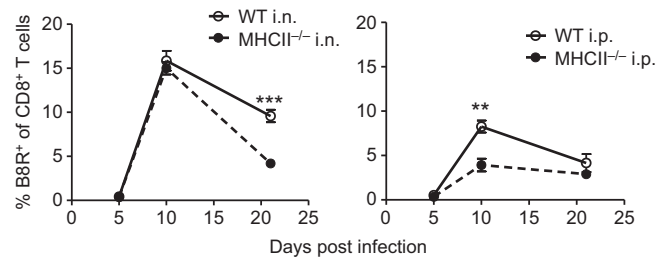

**Supplemental Figure 1.** Kinetics of B8R-specific CD8<sup>+</sup> T cell response in the lungs. WT and MHCII<sup>-/-</sup> mice were infected with 10<sup>3</sup> PFU of VACV intranasally (i.n.) or intraperitoneally (i.p.). B8R-specific CD8<sup>+</sup> T cells were identified by staining with B8R tetramer and anti-CD8 $\alpha$  Ab at the indicated times. Data are representative of two independent experiments with four mice per group. \*\*,  $p < 0.01$ ; \*\*\*,  $p < 0.001$ .
